# Supplementary material
Source: PubMed Central journal article supplement (PMC2729033)
Supplement: 0906467106_0906467106SI.pdf [file 0906467106_0906467106SI.pdf]

# Supporting Information

Souza et al. 10.1073/pnas.0906467106

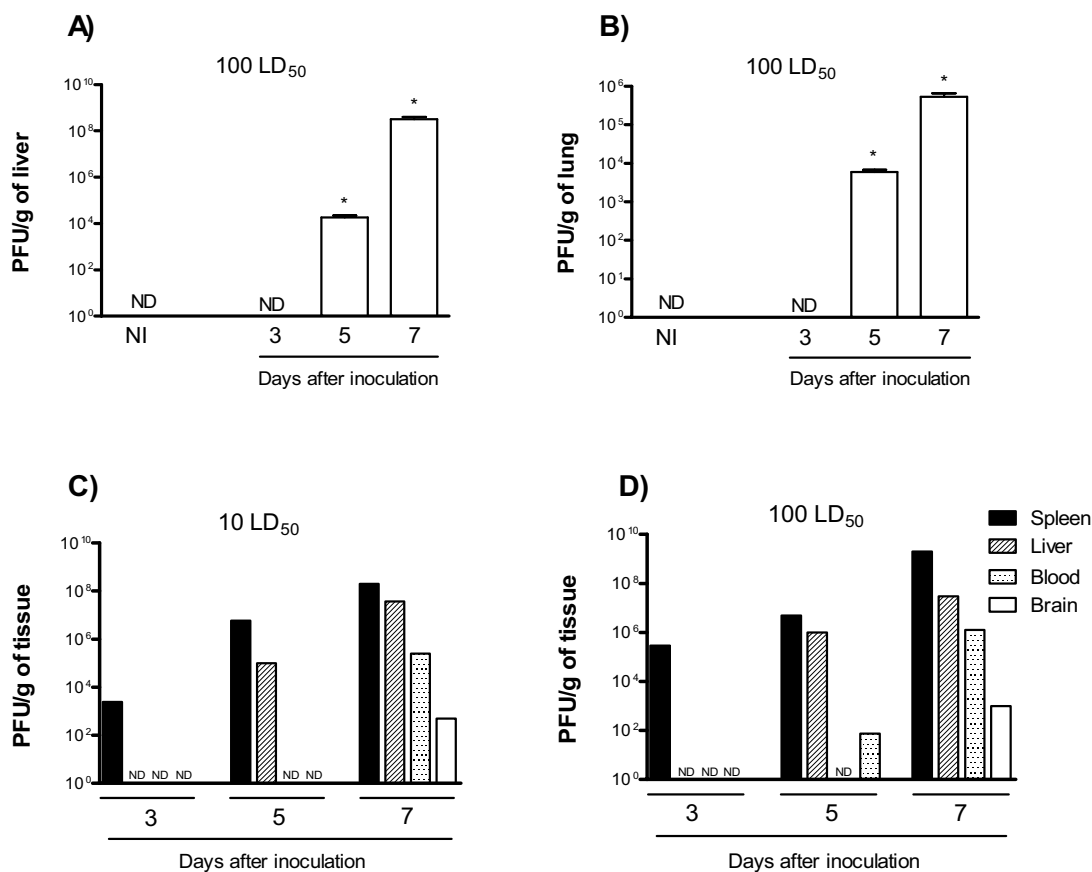

**Fig. S1.** Viral loads in liver, spleen, blood, and brains of BALB/c mice after inoculation with an adapted DEN-2 strain. In (A) and (B), mice were inoculated with 100 LD<sub>50</sub> and the viral loads of DEN-2 were evaluated using a plaque assay in liver (A) and in lungs (B) at days 3, 5, and 7 after inoculation. Results are the mean  $\pm$  SEM and there were 6 animals in each experimental group and are expressed as PFU/g tissue. In (C) and (D), mice were inoculated with 10 LD<sub>50</sub> (C) or 100 LD<sub>50</sub> (D) of the adapted-DEN-2 and the viral loads were evaluated 3, 5, and 7 days after infection by a plaque assay. Results is a representative value found in 1 of 2 assays of pooled tissue homogenates of 6 animals in each group and are expressed as PFU/g of tissue. NI, non-infected mice. ND, not detected.

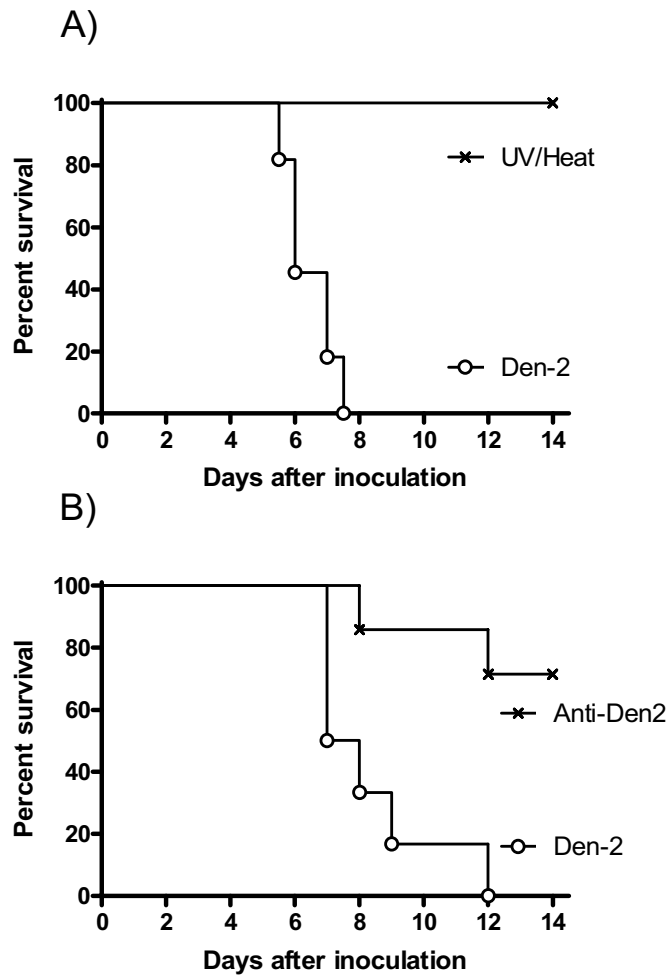

**Fig. S2.** Lethality of DEN-2-inoculated BALB/c mice is prevented by heat or UV-inactivation or by pretreatment with an anti-DEN-2 antiserum. In (A), the viral inoculum (100 LD<sub>50</sub>) was heat inactivated (Heat, 56 °C, 60 min) or treated with UV light (UV, 7 min) before inoculation of BALB/c mice. In (B), animals were pretreated i.p. with 100 μL anti-DEN-2 antiserum or control serum (preimmune serum) 60 min before inoculation with 100 LD<sub>50</sub> of DEN-2. Lethality was evaluated every 12 h (*n* = 8 mice per group). There was significant protection (*P* < 0.01) of mice inoculated with inactivated virus or treated with the anti-DEN-2 antiserum.

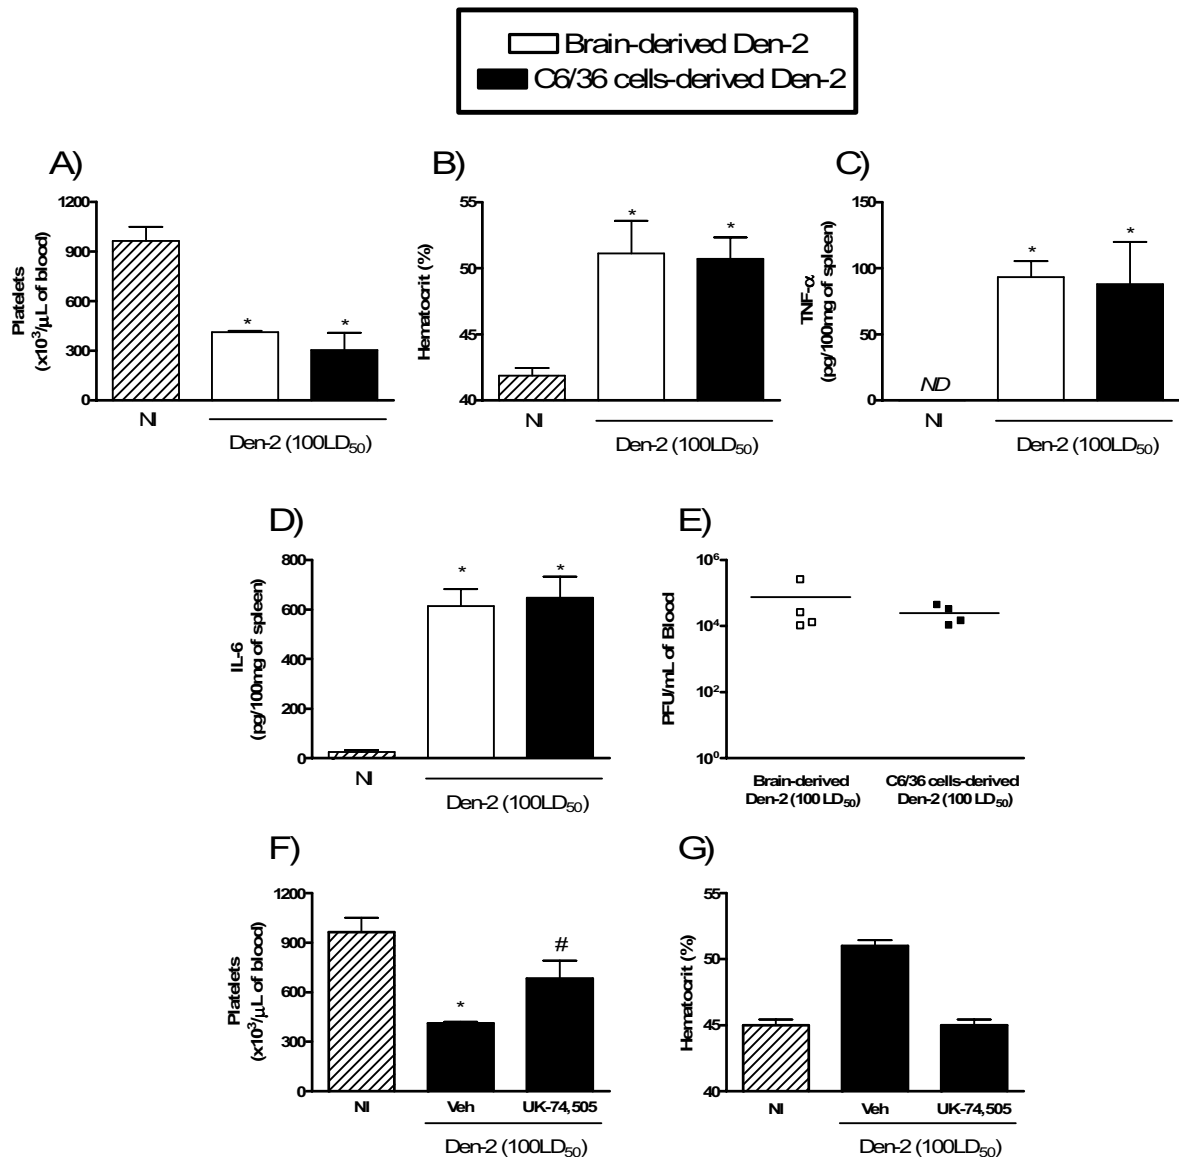

**Fig. S3.** Passage of adapted-Den-2 virus in permissive cell cultures do not alter the pathological findings induced by virus inoculation in BALB/c mice. Mice were inoculated with 100 LD<sub>50</sub> of brain-derived Den-2 (white bars) or C6/36 cell-derived Den-2 (black bars). Control non-infected mice (NI) were injected with brain suspension from normal animals. On day 7, mice were culled and several parameters of the infection determined. The number of platelets (A) and hematocrit (B) in blood of NI and DEN-2-infected mice were evaluated as described in the *Methods* section. Platelet counts are shown as the number of platelets  $\times 10^3/\mu\text{L}$  blood and hematocrit as % volume occupied by red blood cells. The levels of TNF- $\alpha$  (C) and IL-6 (D) in spleen were determined by ELISA and are shown as pg cytokine per 100 mg spleen. Results are the mean  $\pm$  SEM, and there were 6 animals in each experimental group. In (E), viral loads in blood of individual mice at day 7 after infection. In (F) and (G), note the effects of the treatment with the PAFR antagonist, UK-74,505, in mice infected with the C6/36-derived Den-2. UK-74,505 was given at the dose of 10 mg/kg twice a day and treatments was started on day 5 and continued until day 7 after inoculation. \*,  $P < 0.01$  when comparing Den-2 infected with NI mice and # for  $P < 0.01$  when comparing to UK-74,505-treated and infected mice. NI, non-infected mice. ND, not detected.

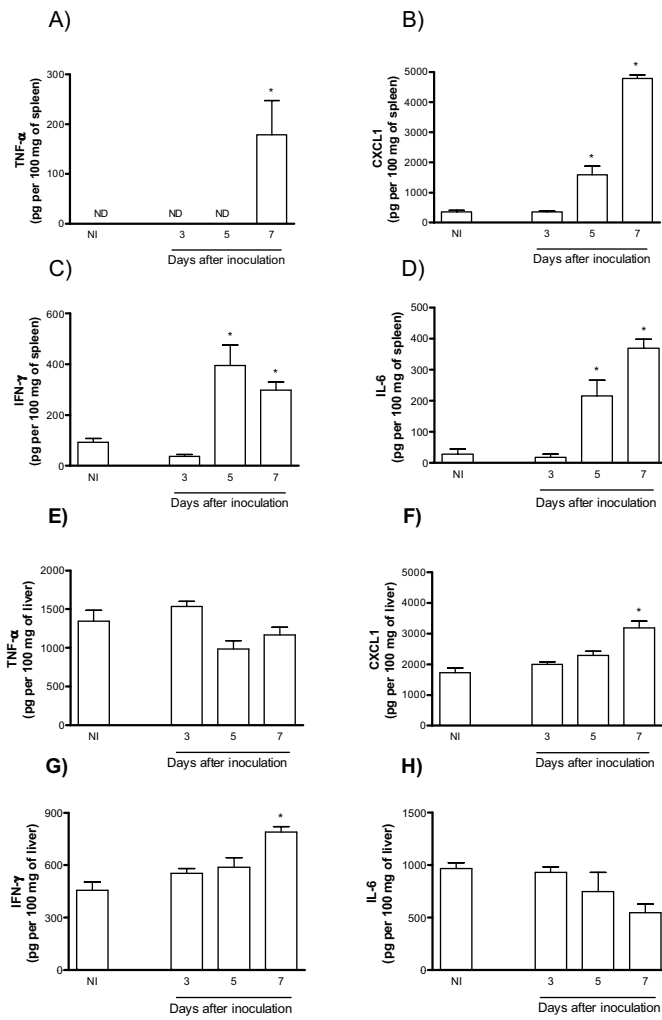

**Fig. S4.** Levels of cytokines in the *spleen* and *liver* of BALB/c mice after inoculation with an adapted DEN-2 strain. Mice were inoculated with 100 LD<sub>50</sub> and the concentrations of TNF-α (A and E), CXCL1 (B and F), IFN-γ (C and G), and IL-6 (D and H) in the spleen and liver evaluated by ELISA at days 3, 5, and 7 after inoculation. Control non-infected mice (NI) were injected with brain suspension from normal animals. Results are shown as pg cytokine per 100 mg spleen or liver and are the mean ± SEM of *n* = 6 animals in each group. \*\*, *P* < 0.01 when compared to control uninfected mice. ND, not detected.

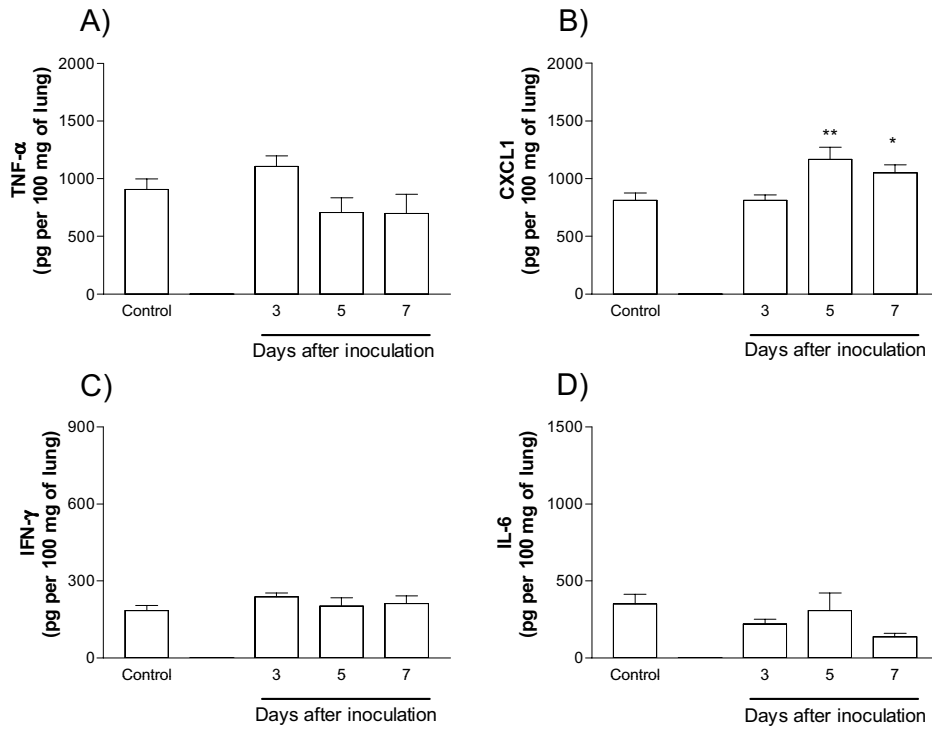

**Fig. S5.** Levels of cytokines in the *lungs* of BALB/c mice after inoculation with an adapted DEN-2 strain. Mice were inoculated with 100 LD<sub>50</sub> and the concentrations of TNF- $\alpha$  (A), CXCL1 (B), IFN- $\gamma$  (C), and IL-6 (D) in the lungs evaluated by ELISA at days 3, 5, and 7 after inoculation. Control non-infected mice (NI) were injected with brain suspension from normal animals. Results are shown as pg cytokine per 100 mg lungs and are the mean  $\pm$  SEM of  $n = 6$  animals in each group. \*\*,  $P < 0.01$  when compared to control uninfected mice. ND, not detected.

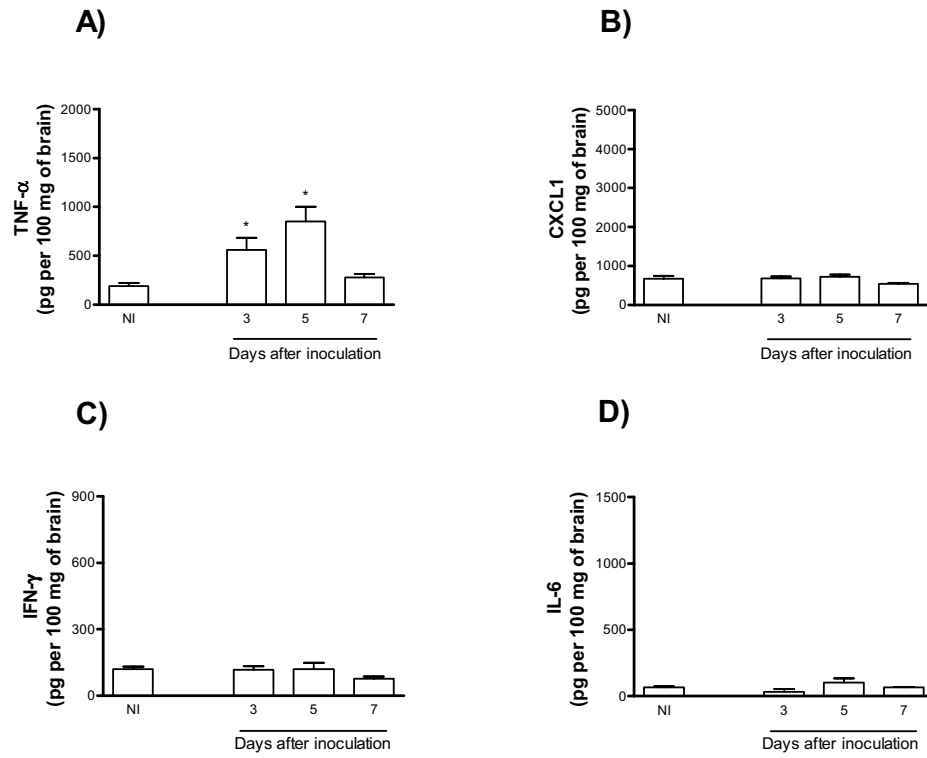

**Fig. S6.** Levels of cytokines in the *brain* of BALB/c mice after inoculation with an adapted DEN-2 strain. Mice were inoculated with 100 LD<sub>50</sub> and the concentrations of TNF- $\alpha$  (A), CXCL1 (B), IFN- $\gamma$  (C), and IL-6 (D) in the brain evaluated by ELISA at days 3, 5, and 7 after inoculation. Control non-infected mice (NI) were injected with brain suspension from normal animals. Results are shown as pg cytokine per 100 mg brain and are the mean  $\pm$  SEM of  $n = 6$  animals in each group. \*\*,  $P < 0.01$  when compared to control uninfected mice. ND, not detected.

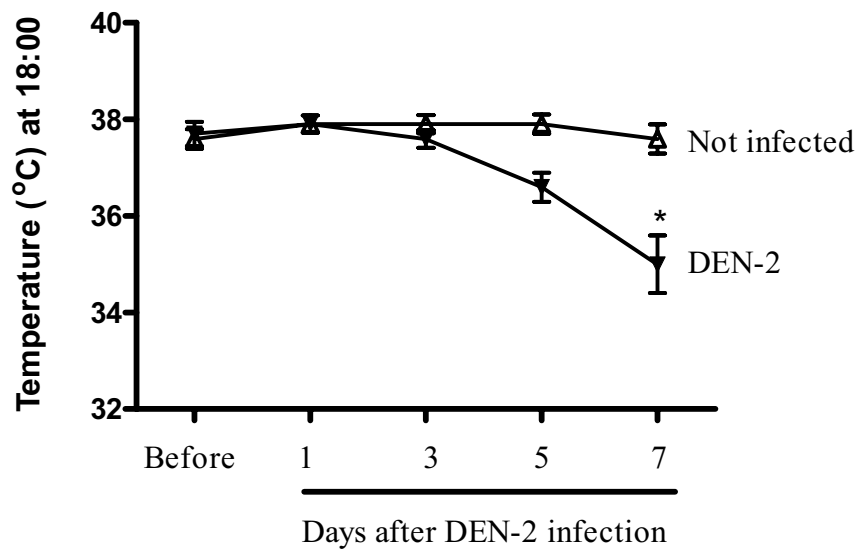

**Fig. 57.** Body temperature of BALB/c mice after inoculation with an adapted DEN-2 strain. Mice were inoculated with 100 LD<sub>50</sub> and the body temperature was monitored each 2 days by a probe installed in the animal abdomen. Control non-infected mice (NI) were injected with brain suspension from normal animals. Results are shown as °C and are the mean  $\pm$  SEM of  $n = 6$  animals in each group. \*\*,  $P < 0.01$  when compared to control uninfected mice.

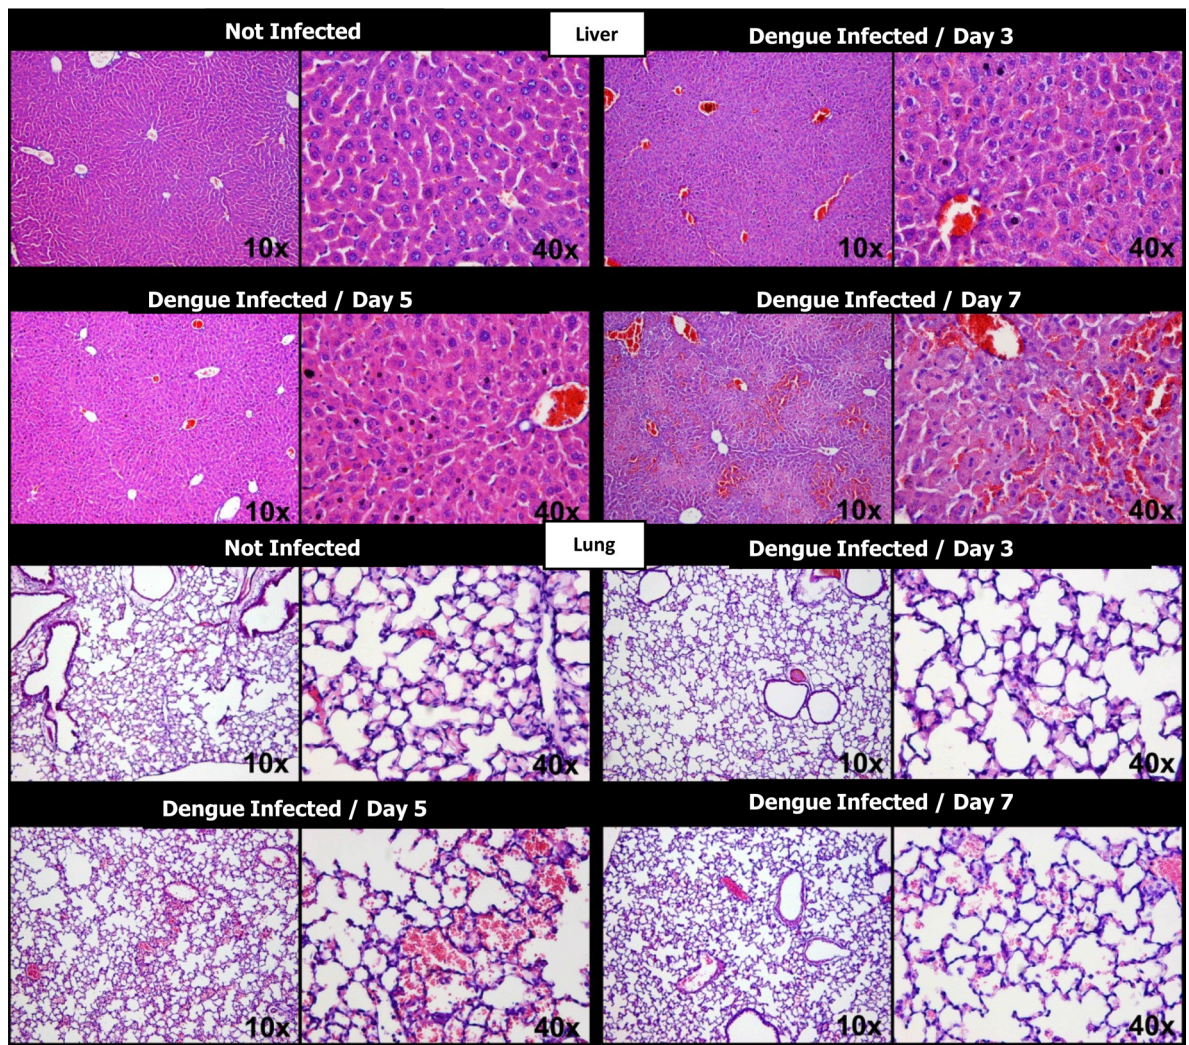

**Fig. 58.** Histopathological evaluation of the liver and lungs of BALB/c mice after inoculation with an adapted DEN-2 strain. Mice were inoculated with 100 LD<sub>50</sub> and the liver and lungs obtained at days 3, 5, and 7 after inoculation. Control non-infected mice (Not Infected) were injected with brain suspension from normal animals. The organs were processed for H&E staining. The photomicrographs were taken from representative sections of at least 4 animals in each group (100 or 400 $\times$ ).





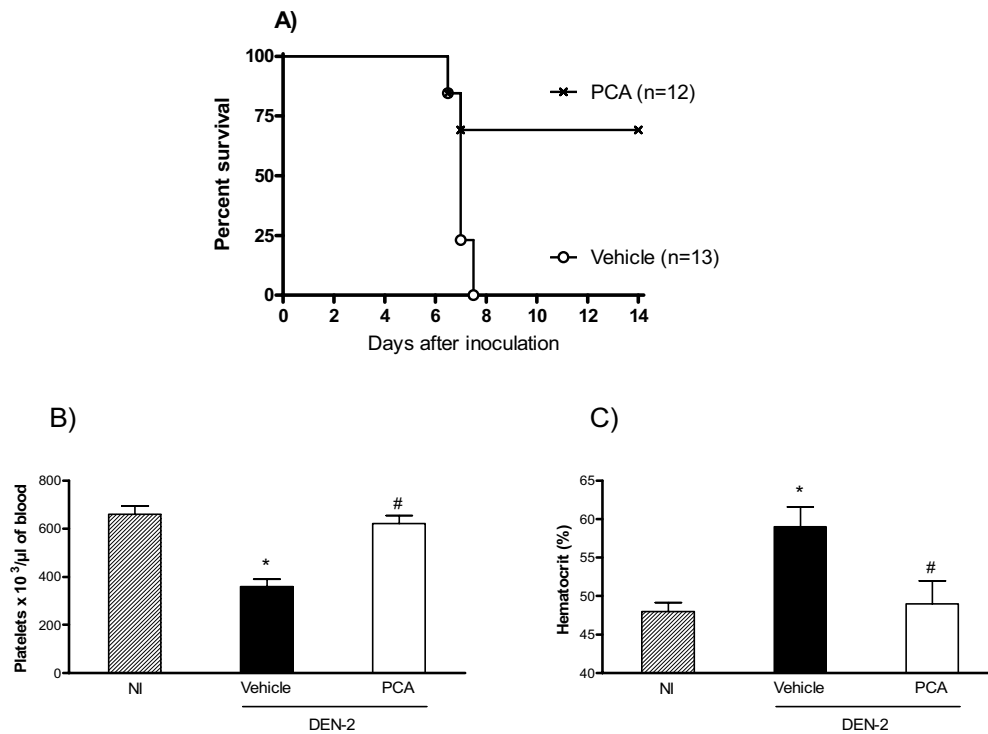

**Fig. S10.** Lethality is delayed and disease is prevented by treatment of DEN-2-inoculated BALB/c mice with the PAFR antagonist PCA-4248. Vehicle or PCA-4248-treated mice were inoculated with 100 LD<sub>50</sub> of DEN-2 and lethality (A) was evaluated every 12 h ( $n = 8$  mice per group). The number of platelets (A) and hematocrit (B) in blood of NI and of Vehicle or PCA-4248-treated DEN-2 infected mice were evaluated 7 days later, as described in the *Methods* section. Platelet counts are shown as the number of platelets  $\times 10^3/\mu\text{L}$  blood and hematocrit as % volume occupied by red blood cells. PCA-4248 was given at the dose of 5 mg/kg twice a day and treatments was started on day 5 and continued until day 10 after inoculation. There was significant protection ( $P < 0.01$ ) of mice treated with PCA-4248.
